# Supplementary material for: Intelligent Assistants
Source: Springer Nature journal article supplement (doi:10.1007/s12599-022-00743-1), 2022-03-07
Supplement: MOESM1 [file 20199702]

# **Intelligent Assistants – Conceptual Dimensions, Contextual Model, and Design Trends**

**Hitesh Dhiman, Christoph Wächter, Michael Fellmann, Carsten Röcker**

Business & Information Systems Engineering (2022)

**Appendix (available online via <http://link.springer.com>)**

## A Complete List of Articles used for Literature Review

### List of Articles used for Research Objective 1

- Erickson T, Danis CM, Kellogg WA, Helander ME (2008) Assistance: the work practices of human administrative assistants and their implications for it and organizations. In: Proceedings of the ACM 2008 conference on Computer supported cooperative work - CSCW '08, ACM Press, San Diego, CA, USA, p 609, 10.1145/1460563.1460658, <http://portal.acm.org/citation.cfm?doid=1460563.1460658>
- Hall S, Quick J, Hall A, Jones A (2014) Surgical assistance - who can help? The Bulletin of the Royal College of Surgeons of England 96(7):244–246, 10.1308/rcsbull.2014.96.7.244, <http://publishing.rcseng.ac.uk/doi/10.1308/rcsbull.2014.96.7.244>
- Henshall C, Doherty A, Green H, Westcott L, Aveyard H (2019) The role of the assistant practitioner in the clinical setting: a focus group study. part 1. British Journal of Healthcare Assistants 13(2):94–99, 10.12968/bjha.2019.13.2.94, <https://doi.org/10.12968/bjha.2019.13.2.94>
- Kerry T (2005) Towards a typology for conceptualizing the roles of teaching assistants. Educational Review 57(3):373–384, 10.1080/00131910500149515, <http://www.tandfonline.com/doi/abs/10.1080/00131910500149515>
- Minondo S, Meyer LH, Xin JF (2001) The Role and Responsibilities of Teaching Assistants in Inclusive Education: What's Appropriate? Journal of the Association for Persons with Severe Handicaps 26(2):114–119, 10.2511/rpsd.26.2.114, <http://journals.sagepub.com/doi/10.2511/rpsd.26.2.114>
- Perry M, Carpenter I, Challis D, Hope K (2003) Understanding the roles of registered general nurses and care assistants in UK nursing homes. Journal of Advanced Nursing 42(5):497–505, 10.1046/j.1365-2648.2003.02649.x, <http://doi.wiley.com/10.1046/j.1365-2648.2003.02649.x>
- Quick J (2013) The role of the surgical care practitioner within the surgical team. British Journal of Nursing 22(13):759–765, 10.12968/bjon.2013.22.13.759, <http://www.magonlinelibrary.com/doi/10.12968/bjon.2013.22.13.759>
- Taché S, Hill-Sakurai L (2010) Medical assistants: the invisible “glue” of primary health care practices in the United States? Journal of Health Organization and Management 24(3):288–305, 10.1108/14777261011054626, <https://www.emerald.com/insight/content/doi/10.1108/14777261011054626/full/html>
- Takala M (2007) The work of classroom assistants in special and mainstream education in Finland. British Journal of Special Education 34(1):50–57, 10.1111/j.1467-8578.2007.00453.x, <http://doi.wiley.com/10.1111/j.1467-8578.2007.00453.x>
- Whisler TL (1960) The “Assistant-to” in Four Administrative Settings. Administrative Science Quarterly 5(2):181, 10.2307/2390778, <https://www.jstor.org/stable/2390778?origin=crossref>

### List of Articles used for Research Objectives 2 & 3

- Aist G, Dowding J, Hockey BA, Rayner M, Hieronymus J, Bohus D, Boven B, Blaylock N, Campana E, Early S, Gorrell G, Phan S (2003) Talking Through Procedures: An Intelligent Space Station Procedure Assistant. In: Proceedings of the Tenth Conference on European Chapter of the Association for Computational Linguistics - Volume 2, Association for Computational Linguistics, Stroudsburg, PA, USA, EACL '03, pp 187–190, 10.3115/1067737.1067781, <https://doi.org/10.3115/1067737.1067781>, event-place: Budapest, Hungary
- Alvarez I, López-de Ipiña MK, Gilbert JE (2012) The Voice User Help, a Smart Vehicle Assistant for the Elderly. In: Hutchison D, Kanade T, Kittler J, Kleinberg JM, Mattern F, Mitchell JC, Naor M, Nierstrasz O, Pandu Rangan C, Steffen B, Sudan M, Terzopoulos D, Tygar D, Vardi MY, Weikum G, Bravo J, López-de Ipiña D, Moya F (eds) Ubiquitous Computing and Ambient Intelligence, vol 7656, Springer Berlin Heidelberg, Berlin, Heidelberg, pp 314–321, 10.1007/978-3-642-35377-2\_43, [http://link.springer.com/10.1007/978-3-642-35377-2\\_43](http://link.springer.com/10.1007/978-3-642-35377-2_43)
- Arai F, Ito M, Fukuda T, Negoro M, Naito T (1995) Intelligent assistance for intravascular tele-surgery and experiments on virtual simulator. In: Proceedings Virtual Reality Annual International Symposium '95, pp 101–107, 10.1109/VRAIS.1995.512485
- Armenatzoglou N, Marketakis Y, Kriara L, Apostolopoulos E, Papavasiliou V, Kampas D, Kapravelos A, Kartsonakis E, Linardakis G, Nikitaki S, Bikakis A, Antoniou G (2009) FleXConf: A Flexible Conference Assistant Using Context-Aware Notification Services. In: Hutchison D, Kanade T, Kittler J, Kleinberg JM, Mattern F, Mitchell JC, Naor M, Nierstrasz O, Pandu Rangan C, Steffen B, Sudan M, Terzopoulos D, Tygar D, Vardi MY, Weikum G, Meersman R, Herrero P, Dillon T (eds) On the Move to Meaningful Internet Systems: OTM 2009 Workshops, vol 5872, Springer Berlin Heidelberg, Berlin, Heidelberg, pp 108–117, 10.1007/978-3-642-05290-3\_20, [http://link.springer.com/10.1007/978-3-642-05290-3\\_20](http://link.springer.com/10.1007/978-3-642-05290-3_20)
- Attanayake D, Pfluegel E, Hunter G, Denholm-Price J (2012) SWIMS (Speech-Based Web Interface for Mathematics Using Statistical Language Models): An Intelligent Editing Assistant for Mathematical Text. In: 2012 Eighth International Conference on Intelligent Environments, pp 327–330, 10.1109/IE.2012.41
- Babaian T, Grosz BJ, Shieber SM (2002) A Writer's Collaborative Assistant. In: Proceedings of the 7th International Conference on Intelligent User Interfaces, ACM, New York, NY, USA, IUI '02, pp 7–14, 10.1145/502716.502722, <http://doi.acm.org/10.1145/502716.502722>, event-place: San Francisco, California, USA
- Balinsky H, Moore NCA, Simske SJ (2011) Intelligent Assistant for Context-Aware Policies. In: 2011IEEE 10th International Conference on Trust, Security and Privacy in Computing and Communications, pp 621–630, 10.1109/TrustCom.2011.80
- Bench-Capon TJM, Staniford G (1995) PLAID: Proactive Legal Assistance. In: Proceedings of the 5th International Conference on Artificial Intelligence and Law, ACM, New York, NY, USA, ICAIL '95, pp 81–88, 10.1145/222092.222142, <http://doi.acm.org/10.1145/222092.222142>, event-place: College Park, Maryland, USA
- Berry PM, Gervasio M, Peintner B, Yorke-Smith N (2011) PTIME: Personalized Assistance for Calendaring. ACM Trans Intell Syst Technol 2(4):40:1–40:22, 10.1145/1989734.1989744, <http://doi.acm.org/10.1145/1989734.1989744>
- Bhattacharya S, Floréen P, Forsblom A, Hemminki S, Myllymäki P, Nurmi P, Pulkkinen T, Salovaara A (2012) Ma\$iv – An Intelligent Mobile Grocery Assistant. In: 2012 Eighth International Conference on Intelligent Environments, pp 165–172, 10.1109/IE.2012.21
- Bolcer GA (1994) User interface design assistance for large-scale software development. In: Proceedings KBSE '94. Ninth Knowledge-Based Software Engineering Conference, pp 142–149, 10.1109/KBSE.1994.342668

- Bouloutian S, Kim E (2014) Artificial Intelligence Gaming Assistant for Google Glass. In: Bebis G, Boyle R, Parvin B, Koracin D, McMahan R, Jerald J, Zhang H, Drucker SM, Kambhampettu C, El Choubassi M, Deng Z, Carlson M (eds) *Advances in Visual Computing*, vol 8888, Springer International Publishing, Cham, pp 770–778, 10.1007/978-3-319-14364-4\_74, [http://link.springer.com/10.1007/978-3-319-14364-4\\_74](http://link.springer.com/10.1007/978-3-319-14364-4_74)
- Bradley N, Fritz T, Holmes R (2018) Context-Aware Conversational Developer Assistants. In: 2018 IEEE/ACM 40th International Conference on Software Engineering (ICSE), pp 993–1003, 10.1145/3180155.3180238, iSSN: 1558-1225
- Brancaleoni R, Cesta A, D'Aloisi D (1997) MASMA: A personal assistant for meetings management. In: Carbonnell JG, Siekmann J, Goos G, Hartmanis J, Leeuwen J, Lenzerini M (eds) *AI\*IA 97: Advances in Artificial Intelligence*, vol 1321, Springer Berlin Heidelberg, Berlin, Heidelberg, pp 455–458, 10.1007/3-540-63576-9\_135, [http://link.springer.com/10.1007/3-540-63576-9\\_135](http://link.springer.com/10.1007/3-540-63576-9_135)
- Brezillon PJ (1994) Design of an intelligent assistant system from several applications. In: *Proceedings of International Conference on Expert Systems for Development*, pp 228–233, 10.1109/ICESD.1994.302276
- Caine A, Cohen R (2006) MITS: A Mixed-Initiative Intelligent Tutoring System for Sudoku. In: Kanade T, Kittler J, Kleinberg JM, Mattern F, Mitchell JC, Nierstrasz O, Pandu Rangan C, Steffen B, Sudan M, Terzopoulos D, Tygar D, Vardi MY, Weikum G, Tawfik AY, Goodwin SD (eds) *Advances in Artificial Intelligence*, vol 3060, Springer Berlin Heidelberg, Berlin, Heidelberg, pp 550–561, 10.1007/11766247\_47, [http://link.springer.com/10.1007/11766247\\_47](http://link.springer.com/10.1007/11766247_47)
- Casamayor A, Amandi A, Campo M (2009) Intelligent assistance for teachers in collaborative e-learning environments. *Computers & Education* 53(4, SI):1147–1154, 10.1016/j.compedu.2009.05.025
- Chaari WL, Moisan S, Ghalila SS, Rigault J (2007) Distributed Intelligent Medical Assistant for Osteoporosis Detection. In: 2007 29th Annual International Conference of the IEEE Engineering in Medicine and Biology Society, pp 4347–4350, 10.1109/IEMBS.2007.4353299
- Chen L, Cheng S, Birnbaum L, Hammond KJ (2002) The Interactive Chef: A Task-sensitive Assistant. In: *Proceedings of the 7th International Conference on Intelligent User Interfaces*, ACM, New York, NY, USA, IUI '02, pp 234–234, 10.1145/502716.502773, <http://doi.acm.org/10.1145/502716.502773>, event-place: San Francisco, California, USA
- Costello E, Doody J, McGinty L, Smyth B (2006) iCARE: Intelligent Customer Assistance for Recommending Eyewear. In: *Proceedings of the 11th International Conference on Intelligent User Interfaces*, ACM, New York, NY, USA, IUI '06, pp 282–284, 10.1145/1111449.1111511, <http://doi.acm.org/10.1145/1111449.1111511>, event-place: Sydney, Australia
- Coyle L, Cunningham P, Hayes C (2002) A Case-Based Personal Travel Assistant for Elaborating User Requirements and Assessing Offers. In: Goos G, Hartmanis J, van Leeuwen J, Craw S, Preece A (eds) *Advances in Case-Based Reasoning*, vol 2416, Springer Berlin Heidelberg, Berlin, Heidelberg, pp 505–518, 10.1007/3-540-46119-1\_37, [http://link.springer.com/10.1007/3-540-46119-1\\_37](http://link.springer.com/10.1007/3-540-46119-1_37)
- Croatti A, Montagna S, Ricci A (2017) A Personal Medical Digital Assistant Agent for Supporting Human Operators in Emergency Scenarios. In: Sukthankar G, Rodriguez-Aguilar JA (eds) *Autonomous Agents and Multiagent Systems*, vol 10643, Springer International Publishing, Cham, pp 228–244, 10.1007/978-3-319-71679-4\_15, [http://link.springer.com/10.1007/978-3-319-71679-4\\_15](http://link.springer.com/10.1007/978-3-319-71679-4_15)
- Crossen A, Budzik J, Warner M, Birnbaum L, Hammond KJ (2001) XLibris: An Automated Library Research Assistant. In: *Proceedings of the 6th International Conference on Intelligent User Interfaces*, ACM, New York, NY, USA, IUI '01, pp 49–52, 10.1145/359784.360100, <http://doi.acm.org/10.1145/359784.360100>, event-place: Santa Fe, New Mexico, USA
- Czibula G, Guran A, Czibula IG, Cojocar GS (2009) IPA - An intelligent personal assistant agent for task performance support. In: 2009 IEEE 5th International Conference on Intelligent Computer Communication and Processing, pp 31–34, 10.1109/ICCP.2009.5284791
- De Roeck A, Kruschwitz U, Neal P, Scott P, Steel S, Turner R, Webb N (1998) YPA - an intelligent directory enquiry assistant. *BT TECHNOLOGY JOURNAL* 16(3):145–155, 10.1023/A:1009650503571
- Delgrange C, Dussoux J, Dominey PF (2019) Usage-Based Learning in Human Interaction with an Adaptive Virtual Assistant. *IEEE Transactions on Cognitive and Developmental Systems* pp 1–1, 10.1109/TCDS.2019.2927399
- Dillenburg JF, Wolfson O, Nelson PC (2002) The Intelligent Travel Assistant. In: *Proceedings. The IEEE 5th International Conference on Intelligent Transportation Systems*, pp 691–696, 10.1109/ITSC.2002.1041302
- Djian D (2000) Communication Management: E-Mail and Telephone Assistants. In: Goos G, Hartmanis J, van Leeuwen J, Azvine B, Nauck DD, Azarmi N (eds) *Intelligent Systems and Soft Computing*, vol 1804, Springer Berlin Heidelberg, Berlin, Heidelberg, pp 284–300, 10.1007/10720181\_12, [http://link.springer.com/10.1007/10720181\\_12](http://link.springer.com/10.1007/10720181_12)
- Dong R, McCarthy K, O'Mahony M, Schaal M, Smyth B (2012) Towards an Intelligent Reviewer's Assistant: Recommending Topics to Help Users to Write Better Product Reviews. In: *Proceedings of the 2012 ACM International Conference on Intelligent User Interfaces*, ACM, New York, NY, USA, IUI '12, pp 159–168, 10.1145/2166966.2166995, <http://doi.acm.org/10.1145/2166966.2166995>, event-place: Lisbon, Portugal
- Elizalde F, Sucar E, deBuen P (2006) An Intelligent Assistant for Training of Power Plant Operators. In: *Sixth IEEE International Conference on Advanced Learning Technologies (ICALT'06)*, pp 205–207, 10.1109/ICALT.2006.1652406
- Fahmy HI, Douligeris C (1995) END: an expert network designer. *IEEE Network* 9(6):18–27, 10.1109/65.475168
- Fast E, Chen B, Mendelsohn J, Bassen J, Bernstein MS (2018) Iris: A conversational agent for complex tasks. In: *Proceedings of the 2018 CHI conference on human factors in computing systems*, Association for Computing Machinery, New York, NY, USA, CHI '18, 10.1145/3173574.3174047, <https://doi.org/10.1145/3173574.3174047>
- Faulring A, Myers B, Mohnkern K, Schmerl B, Steinfeld A, Zimmerman J, Smailagic A, Hansen J, Siewiorek D (2010) Agent-assisted Task Management That Reduces Email Overload. In: *Proceedings of the 15th International Conference on Intelligent User Interfaces*, ACM, New York, NY, USA, IUI '10, pp 61–70, 10.1145/1719970.1719980, <http://doi.acm.org/10.1145/1719970.1719980>, event-place: Hong Kong, China
- Franke U, Mehring S, Suissa A, Hahn S (1994) The Daimler-Benz steering assistant: a spin-off from autonomous driving. In: *Proceedings of the Intelligent Vehicles '94 Symposium*, pp 120–124, 10.1109/IVS.1994.639486
- Franklin D, Hammond K (2001) The Intelligent Classroom: Providing Competent Assistance. In: *Proceedings of the Fifth International Conference on Autonomous Agents*, ACM, New York, NY, USA, AGENTS '01, pp 161–168, 10.1145/375735.376037, <http://doi.acm.org/10.1145/375735.376037>, event-place: Montreal, Quebec, Canada
- Gavrilis D, Georgoulas G, Vasiloglou N, Nikolakopoulos G (2016) An intelligent assistant for physicians. In: 2016 38th Annual International Conference of the IEEE Engineering in Medicine and Biology Society (EMBC), pp 2586–2589, 10.1109/EMBC.2016.7591259
- Gorecky D, Worgan SF, Meixner G (2011) COGNITO: a cognitive assistance and training system for manual tasks in industry. In: *Proceedings of the 29th Annual European Conference on Cognitive Ergonomics*, Association for Computing Machinery, Rostock, Germany, ECCE '11, pp 53–56, 10.1145/2074712.2074723, <https://doi.org/10.1145/2074712.2074723>

- Görtz M, Ackermann R, Steinmetz R (2004) The Digital Call Assistant: Determine Optimal Time Slots for Calls. In: Hutchison D, Kanade T, Kittler J, Kleinberg JM, Mattern F, Mitchell JC, Naor M, Nierstrasz O, Pandu Rangan C, Steffen B, Sudan M, Terzopoulos D, Tygar D, Vardi MY, Weikum G, Roca V, Rousseau F (eds) *Interactive Multimedia and Next Generation Networks*, vol 3311, Springer Berlin Heidelberg, Berlin, Heidelberg, pp 230–241, 10.1007/978-3-540-30493-7\_21, [http://link.springer.com/10.1007/978-3-540-30493-7\\_21](http://link.springer.com/10.1007/978-3-540-30493-7_21)
- Hanke S, Meinedo H, Portugal D, Belk M, Quintas J, Christodoulou E, Sili M, Dias MS, Samaras G (2015) CogniWin – A Virtual Assistance System for Older Adults at Work. In: Zhou J, Salvendy G (eds) *Human Aspects of IT for the Aged Population. Design for Everyday Life*, vol 9194, Springer International Publishing, Cham, pp 257–268, 10.1007/978-3-319-20913-5\_24, [http://link.springer.com/10.1007/978-3-319-20913-5\\_24](http://link.springer.com/10.1007/978-3-319-20913-5_24)
- Hon Wai Chun, Lai EMK (1997) Intelligent critic system for architectural design. *IEEE Transactions on Knowledge and Data Engineering* 9(4):625–639, 10.1109/69.617054
- Hsu JY, Chien-Jung Ting (1998) PHYSIMC: an intelligent assistant for case-based learning. In: *Proceedings Tenth IEEE International Conference on Tools with Artificial Intelligence (Cat. No.98CH36294)*, pp 296–301, 10.1109/TAI.1998.744857
- Huang C, Chang S, Chen H, Chen C (2014) Performance evaluation of an intelligent multimedia learning assistant platform. In: *2014 IEEE Frontiers in Education Conference (FIE) Proceedings*, pp 1–7, 10.1109/FIE.2014.7044191
- Hung CK, Lai EM (1994) An intelligent assistant for the management of telecommunications network services. In: *Proceedings of International Conference on Expert Systems for Development*, pp 234–237, 10.1109/ICESD.1994.302275
- Jain S, Tiwari V, Balasubramanian A, Balasubramanian N, Chakraborty S (2017) PrIA: A Private Intelligent Assistant. In: *Proceedings of the 18th International Workshop on Mobile Computing Systems and Applications*, ACM, New York, NY, USA, HotMobile '17, pp 91–96, 10.1145/3032970.3032988, <http://doi.acm.org/10.1145/3032970.3032988>, event-place: Sonoma, CA, USA
- Jakob M, Moler Z, Pechoucek M, Vaculin R (2011) Intelligent Content-Based Privacy Assistant for Facebook. In: *2011 IEEE/WIC/ACM International Conferences on Web Intelligence and Intelligent Agent Technology*, vol 1, pp 499–500, 10.1109/WI-IAT.2011.67
- Kebeure S, Pierre S, Probst W (1999) An intelligent information-filtering assistant integrated into a multi-agent architecture. In: *Engineering Solutions for the Next Millennium. 1999 IEEE Canadian Conference on Electrical and Computer Engineering (Cat. No.99TH8411)*, vol 2, pp 996–1001 vol.2, 10.1109/CCECE.1999.808174
- Keng Ng, Kramer J, Magee J, Dulay N (1995) The Software Architect's Assistant—a visual environment for distributed programming. In: *Proceedings of the Twenty-Eighth Annual Hawaii International Conference on System Sciences*, vol 2, pp 254–263 vol.2, 10.1109/HICSS.1995.375454
- Kim J, Spraragen M, Gil Y (2004) An Intelligent Assistant for Interactive Workflow Composition. In: *Proceedings of the 9th International Conference on Intelligent User Interfaces*, ACM, New York, NY, USA, IUI '04, pp 125–131, 10.1145/964442.964466, <http://doi.acm.org/10.1145/964442.964466>, event-place: Funchal, Madeira, Portugal
- Kim SY, Kang JK, Oh SY, Ryu YW, Kim K, Park SC, Kim J (2008) An intelligent and integrated driver assistance system for increased safety and convenience based on all-around sensing. *Journal of Intelligent & Robotic Systems* 51(3):261–287, 10.1007/s10846-007-9187-0
- Kincaid R, Pollock G (2017) Nicky: Toward a Virtual Assistant for Test and Measurement Instrument Recommendations. In: *2017 IEEE 11th International Conference on Semantic Computing (ICSC)*, pp 196–203, 10.1109/ICSC.2017.11
- Knoblock CA, Minton S, Ambite JL, Muslea M, Oh J, Frank M (2001) Mixed-initiative, multi-source information assistants. In: *Proceedings of the 10th international conference on world wide web*, Association for Computing Machinery, New York, NY, USA, WWW '01, p 697–707, 10.1145/371920.372185, <https://doi.org/10.1145/371920.372185>
- Kroupa T, Berka P (2002) WISECON: the intelligent support for e-commerce. In: *Proceedings First International IEEE Symposium Intelligent Systems*, vol 1, pp 210–214 vol.1, 10.1109/IS.2002.1044256
- Kurata Y (2010) Interactive Assistance for Tour Planning. In: Hutchison D, Kanade T, Kittler J, Kleinberg JM, Mattern F, Mitchell JC, Naor M, Nierstrasz O, Pandu Rangan C, Steffen B, Sudan M, Terzopoulos D, Tygar D, Vardi MY, Weikum G, Hölscher C, Shipley TF, Olivetti Belardinelli M, Bateman JA, Newcombe NS (eds) *Spatial Cognition VII*, vol 6222, Springer Berlin Heidelberg, Berlin, Heidelberg, pp 289–302, 10.1007/978-3-642-14749-4\_25, [http://link.springer.com/10.1007/978-3-642-14749-4\\_25](http://link.springer.com/10.1007/978-3-642-14749-4_25)
- Kwasnicka H, Szul D, Markowska-Kaczmarska U, Myszkowski PB (2008) Learning Assistant - Personalizing Learning Paths in e-Learning Environments. In: *2008 7th Computer Information Systems and Industrial Management Applications*, pp 308–314, 10.1109/CISIM.2008.51
- Lam MS, Campagna G, Xu S, Fischer M, Moradshahi M (2019) Protecting privacy and open competition with Almond: An open-source virtual assistant. <https://doi.org/10.1145/3355757>
- Lam MSW, Chan EYK, Lee VCS, Yu YT (2008) Designing an Automatic Debugging Assistant for Improving the Learning of Computer Programming. In: Fong J, Kwan R, Wang FL (eds) *Hybrid Learning and Education*, vol 5169, Springer Berlin Heidelberg, Berlin, Heidelberg, pp 359–370, 10.1007/978-3-540-85170-7\_32, [http://link.springer.com/10.1007/978-3-540-85170-7\\_32](http://link.springer.com/10.1007/978-3-540-85170-7_32)
- Lesta L, Yacef K (2002) An intelligent teaching assistant system for logic. In: Cerri, SA and Gouarderes, G and Paraguacu, F (ed) *Intelligent Tutoring Systems, Assoc Comp Machinery; Int Federat Informat Proc; Artificial Intelligence Educ Soc; IEEE CS Learning Technol Task Force; French Direct Gen Armement; Asociac Espanola Inteligencia Artificial, Lecture Notes in Computer Science*, vol 2363, pp 421–431
- Li FL, Qiu M, Chen H, Wang X, Gao X, Huang J, Ren J, Zhao Z, Zhao W, Wang L, Jin G, Chu W (2017) AliMe Assist : An Intelligent Assistant for Creating an Innovative E-commerce Experience. In: *Proceedings of the 2017 ACM on Conference on Information and Knowledge Management*, ACM, New York, NY, USA, CIKM '17, pp 2495–2498, 10.1145/3132847.3133169, <http://doi.acm.org/10.1145/3132847.3133169>, event-place: Singapore, Singapore
- Li W, Zhong N, Liu C (2006) ECPIA: An email-centric personal intelligent assistant. In: Wang, G and Peters, JF and Skowron, YY and Yao, YY (ed) *Rough Sets and Knowledge Technology, Proceedings, Int Rough Set Soc; Rough Set & Soft Computat Soc; Chinese Assoc Artificial Intelligence; Natl Nat Sci Fdn China; Chongqing Univ Posts & Telecommun; Chongqing Inst Technol; Chongqing Jiaotong Univ; Chongqing Educ Commiss; Chongqing Sci & Technol Commiss; Chongqing Informat Ind Bur; Chongqing Assoc Sci & Technol, Lecture Notes in Artificial Intelligence*, vol 4062, pp 502–509
- Lino C, Christie M, Ranon R, Bares W (2011) The Director's Lens: An Intelligent Assistant for Virtual Cinematography. In: *Proceedings of the 19th ACM International Conference on Multimedia*, ACM, New York, NY, USA, MM '11, pp 323–332, 10.1145/2072298.2072341, <http://doi.acm.org/10.1145/2072298.2072341>, event-place: Scottsdale, Arizona, USA

- Liu Y, Li S, Wang J, Zeng H, Lu J (2015) A computer vision-based assistant system for the assembly of narrow cabin products. *The International Journal of Advanced Manufacturing Technology* 76(1-4):281–293, 10.1007/s00170-014-6274-9, <http://link.springer.com/10.1007/s00170-014-6274-9>
- Macias JA (2008) Intelligent assistance in authoring dynamically generated web interfaces. *World Wide Web - Internet and Web Information Systems* 11(2):253–286, 10.1007/s11280-008-0043-3
- Magaña VC, Muñoz-Organero M (2016) Artemisa: A Personal Driving Assistant for Fuel Saving. *IEEE Transactions on Mobile Computing* 15(10):2437–2451, 10.1109/TMC.2015.2504976
- Mandow L, Perez-de-la Cruz J (2004) Sindi: an intelligent assistant for highway design. *Expert Systems With Applications* 27(4):635–644, 10.1016/j.eswa.2004.06.005
- Matthews M, Pharr W, Biswas G, Neelakandan H (2000) USCSH: An active intelligent assistance system. *Artificial Intelligence Review* 14(1-2):121–141, 10.1023/A:1006508409887
- May J, Vargas L (1996) SIMPSON: An intelligent assistant for short-term manufacturing scheduling. *European Journal of Operational Research* 88(2):269–286, 10.1016/0377-2217(94)00178-2
- McCauley L, D’Mello S (2006) MIKI: A Speech Enabled Intelligent Kiosk. In: Hutchison D, Kanade T, Kittler J, Kleinberg JM, Mattern F, Mitchell JC, Naor M, Nierstrasz O, Pandu Rangan C, Steffen B, Sudan M, Terzopoulos D, Tygar D, Vardi MY, Weikum G, Gratch J, Young M, Aylett R, Ballin D, Olivier P (eds) *Intelligent Virtual Agents*, vol 4133, Springer Berlin Heidelberg, Berlin, Heidelberg, pp 132–144, 10.1007/11821830\_11, [http://link.springer.com/10.1007/11821830\\_11](http://link.springer.com/10.1007/11821830_11)
- Menczer F, Street WN, Vishwakarma N, Monge AE, Jakobsson M (2002) Intellishopper: A proactive, personal, private shopping assistant. In: *Proceedings of the first international joint conference on autonomous agents and multiagent systems: Part 3*, Association for Computing Machinery, New York, NY, USA, AAMAS ’02, p 1001–1008, 10.1145/545056.545059, <https://doi.org/10.1145/545056.545059>
- Molina M (2001) An Intelligent Sales Assistant for Configurable Products. In: Goos G, Hartmanis J, van Leeuwen J, Zhong N, Yao Y, Liu J, Ohsuga S (eds) *Web Intelligence: Research and Development*, vol 2198, Springer Berlin Heidelberg, Berlin, Heidelberg, pp 596–600, 10.1007/3-540-45490-X\_78, [http://link.springer.com/10.1007/3-540-45490-X\\_78](http://link.springer.com/10.1007/3-540-45490-X_78)
- Molina M (2005) An intelligent assistant for public transport management. In: Huang, DS and Zhang, XP and Huang, GB (ed) *Advances in Intelligent Computing, PT 2, Proceedings, Inst Intelligent Machines; Univ Sci Technol; IEEE Computat Intelligence Soc; Hong Kong Computat Intelligence Chapter, Lecture Notes in Computer Science*, vol 3645, pp 199–208
- Morris JG, Mitchell CM, Potter WJ (1994) A Designer’s Associate: support for the design of software for complex dynamic control systems. In: *Proceedings of IEEE International Conference on Systems, Man and Cybernetics*, vol 2, pp 1745–1750 vol.2, 10.1109/ICSMC.1994.400101
- Myers K, Berry P, Blythe J, Conley K, Gervasio M, McGuinness D, Morley D, Pfeffer A, Pollack M, Tambe M (2007) An intelligent personal assistant for task and time management. *AI MAGAZINE* 28(2):47–61
- Oliver N, Czerwinski M, Smith G, Roomp K (2008) RelAltTab: Assisting Users in Switching Windows. In: *Proceedings of the 13th International Conference on Intelligent User Interfaces*, ACM, New York, NY, USA, IUI ’08, pp 385–388, 10.1145/1378773.1378836, <http://doi.acm.org/10.1145/1378773.1378836>, event-place: Gran Canaria, Spain
- Ozeki M, Maeda S, Obata K, Nakamura Y (2008) Virtual assistant: an artificial agent for enhancing content acquisition: how ambient media elicit information from humans. In: *Proceedings of the 1st ACM international workshop on Semantic ambient media experiences*, Association for Computing Machinery, Vancouver, British Columbia, Canada, SAME ’08, pp 75–82, 10.1145/1461912.1461927, <https://doi.org/10.1145/1461912.1461927>
- P D, Bhamidipaty A, Challa S (2008) Intelligent User Assistance for Cost Effective Usage of Mobile Phone. In: *Proceedings of the 13th International Conference on Intelligent User Interfaces*, ACM, New York, NY, USA, IUI ’08, pp 317–320, 10.1145/1378773.1378819, <http://doi.acm.org/10.1145/1378773.1378819>, event-place: Gran Canaria, Spain
- Payne VL, Metzler DP (2005) Hospital care watch (HCW): an ontology and rule-based intelligent patient management assistant. In: *18th IEEE Symposium on Computer-Based Medical Systems (CBMS’05)*, pp 479–484, 10.1109/CBMS.2005.64
- Pedro JS, Burstein F (2003) Intelligent Assistance, Retrieval, Reminder and Advice for Fuzzy Multicriteria Decision-Making. In: Goos G, Hartmanis J, van Leeuwen J, Palade V, Howlett RJ, Jain L (eds) *Knowledge-Based Intelligent Information and Engineering Systems*, vol 2774, Springer Berlin Heidelberg, Berlin, Heidelberg, pp 37–44, 10.1007/978-3-540-45226-3\_6, [http://link.springer.com/10.1007/978-3-540-45226-3\\_6](http://link.springer.com/10.1007/978-3-540-45226-3_6)
- Quintero MCG, Cuervo PAC (2017) Intelligent driving assistant based on accident risk maps analysis and intelligent driving diagnosis. In: *2017 IEEE Intelligent Vehicles Symposium (IV)*, pp 914–919, 10.1109/IVS.2017.7995832
- Rai S, Raut A, Savaliya A, Shankarmani R (2018) Darwin: Convolutional Neural Network based Intelligent Health Assistant. In: *2018 Second International Conference on Electronics, Communication and Aerospace Technology (ICECA)*, pp 1367–1371, 10.1109/ICECA.2018.8474861
- Reiterer H, Mußler G, Mann TM, Handschuh S (2000) INSYDER &mdash; an Information Assistant for Business Intelligence. In: *Proceedings of the 23rd Annual International ACM SIGIR Conference on Research and Development in Information Retrieval*, ACM, New York, NY, USA, SIGIR ’00, pp 112–119, 10.1145/345508.345559, <http://doi.acm.org/10.1145/345508.345559>, event-place: Athens, Greece
- Reyes A, Ibarguenoytia PH, Elizalde F, Sánchez L, Nava A (2011) ASISTO: An integrated intelligent assistant system for power plant operation and training. In: *2011 16th International Conference on Intelligent System Applications to Power Systems*, pp 1–6, 10.1109/ISAP.2011.6082189
- Sanchez J, Priest J, Soto R (1997) Intelligent reasoning assistant for incorporating manufacturability issues into the design process. *Expert Systems with Applications* 12(1):81–88, 10.1016/S0957-4174(96)00082-6
- dos Santos CT, Frozza R, Dhamer A, Gaspary LP (2002) DÓRIS — Pedagogical Agent in Intelligent Tutoring Systems. In: Goos G, Hartmanis J, van Leeuwen J, Cerri SA, Gouardères G, Paraguaçu F (eds) *Intelligent Tutoring Systems*, vol 2363, Springer Berlin Heidelberg, Berlin, Heidelberg, pp 91–104, 10.1007/3-540-47987-2\_14, [http://link.springer.com/10.1007/3-540-47987-2\\_14](http://link.springer.com/10.1007/3-540-47987-2_14)
- Santoso HA, Winarsih NAS, Mulyanto E, saraswati GW, Sukmana SE, Rustad S, Rohman MS, Nugraha A, Firdausillah F (2018) Dinus Intelligent Assistance (DINA) Chatbot for University Admission Services. In: *2018 International Seminar on Application for Technology of Information and Communication*, pp 417–423, 10.1109/ISEMANTIC.2018.8549797
- Schäfer U, Arnold F, Ostermann S, Reifers S (2013) Ingredients and Recipe for a Robust Mobile Speech-Enabled Cooking Assistant for German. In: Hutchison D, Kanade T, Kittler J, Kleinberg JM, Mattern F, Mitchell JC, Naor M, Nierstrasz O, Pandu Rangan C, Steffen B, Sudan M, Terzopoulos D, Tygar D, Vardi MY, Weikum G, Timm IJ, Thimm M (eds) *KI 2013: Advances in Artificial*

- Intelligence, vol 8077, Springer Berlin Heidelberg, Berlin, Heidelberg, pp 212–223, 10.1007/978-3-642-40942-4\_19, [http://link.springer.com/10.1007/978-3-642-40942-4\\_19](http://link.springer.com/10.1007/978-3-642-40942-4_19)
- Schmeil A, Broll W (2007) MARA - A Mobile Augmented Reality-Based Virtual Assistant. In: 2007 IEEE Virtual Reality Conference, pp 267–270, 10.1109/VR.2007.352497, iSSN: 2375-5334
- Schmitz M, Baus J, Dörr R (2008) The Digital Sommelier: Interacting with Intelligent Products. In: Floerkemeier C, Langheinrich M, Fleisch E, Mattern F, Sarma SE (eds) *The Internet of Things*, vol 4952, Springer Berlin Heidelberg, Berlin, Heidelberg, pp 247–262, 10.1007/978-3-540-78731-0\_16, [http://link.springer.com/10.1007/978-3-540-78731-0\\_16](http://link.springer.com/10.1007/978-3-540-78731-0_16)
- Segal RB, Kephart JO (1999) MailCat: An Intelligent Assistant for Organizing e-Mail. In: *Proceedings of the Third Annual Conference on Autonomous Agents*, ACM, New York, NY, USA, AGENTS '99, pp 276–282, 10.1145/301136.301209, <http://doi.acm.org/10.1145/301136.301209>, event-place: Seattle, Washington, USA
- Shumin Wu, Ghenniwa H, Weiming Shen, Ma K (2004) Intelligent user assistance in collaborative design environments. In: 8th International Conference on Computer Supported Cooperative Work in Design, vol 2, pp 259–266 Vol.2, 10.1109/CACWD.2004.1349194
- Singh-Múgica S, Tovar-Corona B, Silva-Ramírez MA, Jiménez LG (2016) An intelligent system to assist the diagnosis of epilepsy disorder in children: A case of study. In: 2016 IEEE Healthcare Innovation Point-Of-Care Technologies Conference (HI-POCT), pp 142–145, 10.1109/HIC.2016.7797717
- Sinha D, Basu A (2012) Gardener: A file browser assistant to help users maintaining semantic folder hierarchy. In: 2012 4th International Conference on Intelligent Human Computer Interaction (IHCI), pp 1–6, 10.1109/IHCI.2012.6481780
- St Amant R, Dulberg MS (1998) An Experiment with Navigation and Intelligent Assistance. In: *Proceedings of the 3rd International Conference on Intelligent User Interfaces*, ACM, New York, NY, USA, IUI '98, pp 171–178, 10.1145/268389.268422, <http://doi.acm.org/10.1145/268389.268422>, event-place: San Francisco, California, USA
- Stefanov N, Passenberg C, Peer A, Buss M (2013) Design and Evaluation of a Haptic Computer-Assistant for Telemanipulation Tasks. *IEEE Transactions on Human-Machine Systems* 43(4):385–397, 10.1109/TSMC.2013.2257743
- Strohmann T, Siemon D, Robra-Bissantz S (2017) brAlnstorm: Intelligent Assistance in Group Idea Generation. In: Maedche A, vom Brocke J, Hevner A (eds) *Designing the Digital Transformation*, vol 10243, Springer International Publishing, Cham, pp 457–461, 10.1007/978-3-319-59144-5\_31, [http://link.springer.com/10.1007/978-3-319-59144-5\\_31](http://link.springer.com/10.1007/978-3-319-59144-5_31)
- Sumi Y, Etani T, Fels S, Simonet N, Kobayashi K, Mase K (1998) C-MAP: Building a Context-Aware Mobile Assistant for Exhibition Tours. In: Goos G, Hartmanis J, van Leeuwen J, Ishida T (eds) *Community Computing and Support Systems*, vol 1519, Springer Berlin Heidelberg, Berlin, Heidelberg, pp 137–154, 10.1007/3-540-49247-X\_10, [http://link.springer.com/10.1007/3-540-49247-X\\_10](http://link.springer.com/10.1007/3-540-49247-X_10)
- Terveen LG, Selfridge PG (1994) Intelligent assistance for software construction: a case study. In: *Proceedings KBSE '94. Ninth Knowledge-Based Software Engineering Conference*, pp 14–21, 10.1109/KBSE.1994.342682
- Todorov J, Stoyanov S, Valkanov V, Daskalov B, Popchev I (2016) Learning Intelligent System for Student Assistance - LISSA. In: 2016 IEEE 8th International Conference on Intelligent Systems (IS), pp 753–757, 10.1109/IS.2016.7737397
- Torres M, Pelta DA, Verdegay JL (2018) PRoA: An intelligent multi-criteria Personalized Route Assistant. *Engineering Applications of Artificial Intelligence* 72:162–169, 10.1016/j.engappai.2018.03.016
- Torres VM, Chaves AP, Meech JA (1999) Intelligold-an expert system for gold plant process design. In: *Proceedings of the Second International Conference on Intelligent Processing and Manufacturing of Materials. IPMM'99 (Cat. No.99EX296)*, vol 1, pp 309–316 vol.1, 10.1109/IPMM.1999.792500
- Verheij B (1999) Automated Argument Assistance for Lawyers. In: *Proceedings of the 7th International Conference on Artificial Intelligence and Law*, ACM, New York, NY, USA, ICAIL '99, pp 43–52, 10.1145/323706.323714, <http://doi.acm.org/10.1145/323706.323714>, event-place: Oslo, Norway
- Vollebregt A, Hannessen D, Hesselink H, Beetstra J (2002) Modelling Crew Assistants with Multi-Agent Systems in Fighter Aircraft. In: Goos G, Hartmanis J, van Leeuwen J, Hendtlass T, Ali M (eds) *Developments in Applied Artificial Intelligence*, vol 2358, Springer Berlin Heidelberg, Berlin, Heidelberg, pp 129–135, 10.1007/3-540-48035-8\_13, [http://link.springer.com/10.1007/3-540-48035-8\\_13](http://link.springer.com/10.1007/3-540-48035-8_13)
- Weerawarna NT, Haththella HMHRB, Ambadeniya ARGKBR, Chandrasiri LHSS, Bandara MSL, Thelijjagoda SS (2011) CyberMate : Artificial Intelligent business help desk assistant with instance messaging services. In: 2011 6th International Conference on Industrial and Information Systems, pp 420–424, 10.1109/ICIINFS.2011.6038105
- Winiwarter W (1999) PTA - A Personal Translation Assistant for Accessing the World Wide Web. In: Goos G, Hartmanis J, van Leeuwen J, Bench-Capon TJ, Soda G, Tjoa AM (eds) *Database and Expert Systems Applications*, vol 1677, Springer Berlin Heidelberg, Berlin, Heidelberg, pp 996–1005, 10.1007/3-540-48309-8\_94, [http://link.springer.com/10.1007/3-540-48309-8\\_94](http://link.springer.com/10.1007/3-540-48309-8_94)
- Wittig H, Griwodz C (1995) Intelligent media agents in interactive television systems. In: *Proceedings of the International Conference on Multimedia Computing and Systems*, pp 182–189, 10.1109/MMCS.1995.484923
- Yacef K (2002) Intelligent teaching assistant systems. In: *International Conference on Computers in Education, 2002. Proceedings.*, pp 136–140 vol.1, 10.1109/CIE.2002.1185885
- Yan H, Selker T (2000) Context-aware Office Assistant. In: *Proceedings of the 5th International Conference on Intelligent User Interfaces*, ACM, New York, NY, USA, IUI '00, pp 276–279, 10.1145/325737.325872, <http://doi.acm.org/10.1145/325737.325872>, event-place: New Orleans, Louisiana, USA
- Yang C (2010) LABTA: An Agent-Based Intelligent Teaching Assistant for Experiment Courses. In: Luo X, Spaniol M, Wang L, Li Q, Nejd W, Zhang W (eds) *Advances in Web-Based Learning - ICWL 2010*, vol 6483, Springer Berlin Heidelberg, Berlin, Heidelberg, pp 309–317, 10.1007/978-3-642-17407-0\_32, [http://link.springer.com/10.1007/978-3-642-17407-0\\_32](http://link.springer.com/10.1007/978-3-642-17407-0_32)
- Yang D, Garrett JH, Shaw DS, Rendell LA (1994) An intelligent symbol usage assistant for CAD systems. *IEEE Expert* 9(3):32–41, 10.1109/64.311277
- Yau MY, Lai EM, Chun HW (1994) FPDx: a knowledge-based system for architectural floor plan design. In: *Proceedings of International Conference on Expert Systems for Development*, pp 309–314, 10.1109/ICESD.1994.302261
- Zhang S, Abdul Zada V, Balog K (2018) SmartTable: A Spreadsheet Program with Intelligent Assistance. In: *The 41st International ACM SIGIR Conference on Research & Development in Information Retrieval*, ACM, New York, NY, USA, SIGIR '18, pp 1297–1300, 10.1145/3209978.3210171, <http://doi.acm.org/10.1145/3209978.3210171>, event-place: Ann Arbor, MI, USA
- Zhang W, Wu J (2007) A Learning Search Based Intelligent Assistant of Web Browser. In: 2007 International Conference on Wireless Communications, Networking and Mobile Computing, pp 5629–5631, 10.1109/WICOM.2007.1379

## B Article Selection Methodology

The article selection methodology is shown in **Table 4**. For research objective 1, we conducted a general search for terms that are used to designate the professional roles of assistants or terms. We used the advanced search feature of Google Scholar to look for ‘the exact phrase, anywhere in the article’. Since results are sorted by relevance, for each search we went through the first 10 pages and chose respective articles after reading the abstract.

To consider various terms used in describing intelligent assistants, we conducted an explorative search. We found that articles presenting intelligent assistants use a combination of an adjective as an alias for some sort of intelligent ability (smart, personal, adaptive, cooperative, or intelligent), followed by a verb in some cases which represents an activity (for example driving, writing, teaching, learning etc.), and the word ‘assistant’ or ‘assistance’. These terms were then used to construct a search expression that searches for the adjectives within 5 words of assistan\* (which includes assistance, assistants, assistant). We used a full metadata search (including title, abstract and keywords) and excluded commercially available assistants to focus on the research side of the domain.

We filtered the resulting dataset in two rounds, first by reading the title and then the abstract. The articles selected in the final round were distributed among the co-authors and read in depth.

Table 4: Article Selection Methodology

| Search Terms                                                                                                                                                                                                                                                                                    | Databanks/Search Engine(s)                                                       | Inclusion Criteria                                                                                                                                                  | Exclusion Criteria                                                                                                                                                                                                                                                   | Initial Hits | Filtered first round | Filtered second round |
|-------------------------------------------------------------------------------------------------------------------------------------------------------------------------------------------------------------------------------------------------------------------------------------------------|----------------------------------------------------------------------------------|---------------------------------------------------------------------------------------------------------------------------------------------------------------------|----------------------------------------------------------------------------------------------------------------------------------------------------------------------------------------------------------------------------------------------------------------------|--------------|----------------------|-----------------------|
| <b>A clarification of the notion of assistance (RO1)</b>                                                                                                                                                                                                                                        |                                                                                  |                                                                                                                                                                     |                                                                                                                                                                                                                                                                      |              |                      |                       |
| ‘administrative assistants’, ‘medical assistants’, ‘nursing assistants’, ‘healthcare assistants’, ‘surgical assistants’, ‘teaching assistants’, ‘work of assistants’, ‘role of assistants’ (and variations thereof).                                                                            | Google Scholar                                                                   | Articles carried out a systematic qualitative or ethnographic study of human assistants at work                                                                     | Articles that evaluated workplace trends in the respective fields of assistance                                                                                                                                                                                      | 18           | 11                   | 7                     |
| <b>A typology for intelligent assistance (RO2)</b>                                                                                                                                                                                                                                              |                                                                                  |                                                                                                                                                                     |                                                                                                                                                                                                                                                                      |              |                      |                       |
| (“adjective” + “verb” + “assistan*”) or (“adjective” + “noun” + “assistan*”), where the adjective is one of the following: smart, intelligent, adaptive, personal, cooperative. Wherever supported, a word distance based search was performed (for example “intelligent” ONEAR/5 “assistan*”). | IEEE Explore, ACM Library, Science Direct, SpringerLink and ISI Web of Knowledge | Article was published in the last 25 years (1994-2019), presented a framework or a system that offers some form of assistance, discussed the features of the system | Article did not present a system but used the keywords in a different context, proposed only the design of a system without a description of its functionality, was not available in a full-text form, already existed in the search results or was a review article | 2317         | 356                  | 111                   |
| <b>Design and evaluation criteria for intelligent assistance (RO3)</b>                                                                                                                                                                                                                          |                                                                                  |                                                                                                                                                                     |                                                                                                                                                                                                                                                                      |              |                      |                       |
| n.a.                                                                                                                                                                                                                                                                                            | data set filtered after first round in RO1 was used                              | articles that mention design goals, guidelines or design principles/heuristics etc.                                                                                 | articles that only present a system, do not specify any design goals, guidelines or principles                                                                                                                                                                       |              | 356                  | 24                    |
| n.a.                                                                                                                                                                                                                                                                                            | data set filtered after first round in RO1 was used                              | articles that evaluate the assistance system presented                                                                                                              | articles that do not carry out an evaluation of the presented system                                                                                                                                                                                                 |              | 356                  | 60                    |

## C Typology Creation

The first stage of the typology creation contains characteristics that were identified from RO1 (Conceptual-to-empirical). Since it concerns the human aspect of assistants, we expected that entries would have to be removed or modified. The ‘client’ was removed from the cooperating entities list, since intelligent assistants have been developed for one-to one interaction with the user. The activities performed by human assistants are varied, and were not carried over to the next iteration; the activities of intelligent assistants are primarily digital and interactive. Finally, we did not find any support for contingency response in the design of intelligent assistants, so the dimension was also removed. In the second iteration, we added characteristics of intelligence and intelligent agents, and went through the articles in a chronological manner to refine the typology. The final typology is shown in **Table 1**.

Table 5: Typology Creation Iteration 1 and 2

| Meta-Characteristic | Conceptual-to-empirical (Iteration 1) |                              | Empirical-to-conceptual (Iteration 2) |                            |
|---------------------|---------------------------------------|------------------------------|---------------------------------------|----------------------------|
|                     | Dimension                             | Characteristic               | Dimension                             | Characteristic             |
| Outcome             | outcomes                              | maintain service provision   | outcomes                              | reduce workload            |
|                     |                                       |                              |                                       | learning/skill acquisition |
| Environment         | outcome type                          | augment                      | outcome type                          | augment                    |
|                     |                                       | compensate                   |                                       | compensate                 |
|                     |                                       |                              |                                       |                            |
|                     | cooperating entities                  | principal                    | assistance target                     | user                       |
|                     |                                       | assistant                    |                                       | application                |
|                     |                                       | client                       |                                       | tools                      |
|                     |                                       | tools                        |                                       | objects                    |
|                     | domain                                | teaching                     | domain                                | software development       |
|                     |                                       | medical                      |                                       | design/verification        |
|                     |                                       | administrative               |                                       | legal                      |
| Assistant           | activity                              | foreground tasks             | activity                              | decision support           |
|                     |                                       | background tasks             |                                       | answer queries             |
|                     |                                       | problem solving              |                                       | execute tasks              |
|                     |                                       | maintain situation awareness |                                       |                            |
|                     | initiative                            | self-initiated               | invocation mode                       | autonomous                 |
|                     |                                       | delegation                   |                                       | delegated                  |
|                     |                                       | mixed                        |                                       | mixed                      |
|                     | contingency-response                  | intervene                    | flexibility                           | adaptive                   |
|                     |                                       | adapt                        |                                       | adaptable                  |
|                     |                                       |                              |                                       | static                     |
|                     |                                       |                              | input combination(s)                  | peripheral                 |
|                     |                                       |                              |                                       | speech                     |
|                     |                                       |                              |                                       | language                   |
|                     |                                       |                              | output combination(s)                 | visual                     |
|                     |                                       |                              |                                       | speech                     |
|                     |                                       |                              |                                       | haptic                     |
|                     |                                       |                              | modality                              | unimodal                   |
|                     |                                       |                              |                                       | multimodal                 |
|                     |                                       |                              | character                             | yes                        |
|                     |                                       |                              |                                       | no                         |
|                     | ubiquity                              | platform-specific            |                                       |                            |
|                     |                                       | web-based                    |                                       |                            |
|                     |                                       |                              |                                       |                            |
|                     | learning capability                   | learning                     |                                       |                            |
|                     |                                       | learned                      |                                       |                            |

Table 6: Typology Creation Iteration 3 and 4

| Meta-Characteristic   | Empirical-to-conceptual (Iteration 3) |                            | Empirical-to-conceptual (Iteration 4) |                       |
|-----------------------|---------------------------------------|----------------------------|---------------------------------------|-----------------------|
|                       | Dimension                             | Characteristic             | Characteristic                        |                       |
| Outcome               | outcomes                              | improve productivity       | improve productivity                  |                       |
|                       |                                       | learning/skill acquisition | learning/skill acquisition            |                       |
|                       |                                       | augment experience         | augment experience                    |                       |
|                       |                                       | improve work quality       | improve work quality                  |                       |
|                       | outcome type                          | augment                    | augment                               |                       |
|                       |                                       | compensate                 | compensate                            |                       |
| Environment           | assistance target                     | user                       | application-interface                 |                       |
|                       |                                       | application-interface      | objects                               |                       |
|                       |                                       | tools                      | application-interface & object        |                       |
|                       |                                       | objects                    |                                       |                       |
|                       | domain                                | software development       | professional                          |                       |
|                       |                                       | design/verification        |                                       |                       |
|                       |                                       | medical work               |                                       |                       |
|                       |                                       | legal                      |                                       |                       |
|                       |                                       | administrative             | private                               |                       |
|                       |                                       | education                  | education                             |                       |
|                       |                                       | e-commerce                 |                                       |                       |
|                       | Assistant                             | activity                   | providing information                 | providing information |
|                       |                                       |                            | executing tasks                       | executing tasks       |
|                       |                                       | invocation mode            | autonomous                            | autonomous            |
| delegated             |                                       |                            | delegated                             |                       |
| mixed                 |                                       |                            | mixed                                 |                       |
| flexibility           |                                       | adaptive                   | adaptive                              |                       |
|                       |                                       | adaptable                  | adaptable                             |                       |
|                       |                                       | static                     | static                                |                       |
| input combination(s)  |                                       | peripheral                 | peripheral                            |                       |
|                       |                                       | speech/language            | language and peripheral               |                       |
|                       |                                       | language and peripheral    | language only                         |                       |
|                       |                                       | sensor input               | sensor input                          |                       |
|                       |                                       |                            | peripheral and sensor input           |                       |
|                       |                                       |                            | language & peripheral & sensor input  |                       |
| output combination(s) |                                       | visual                     | visual                                |                       |
|                       |                                       | speech/language            | language and visual feedback          |                       |
|                       |                                       | haptic                     | language only                         |                       |
|                       |                                       |                            | visual and haptic                     |                       |
|                       |                                       |                            | haptic                                |                       |
| modality              |                                       | unimodal                   | unimodal                              |                       |
|                       |                                       | multimodal                 | multimodal                            |                       |
| embodiment            |                                       | yes                        | yes                                   |                       |
|                       |                                       | no                         | no                                    |                       |
| ubiquity              |                                       | platform-specific          | platform-specific                     |                       |
|                       |                                       | mobile                     | mobile                                |                       |
|                       |                                       | web-based                  | web-based                             |                       |
|                       |                                       | multiple devices           | multiple devices                      |                       |
| learning capability   |                                       | learning                   | learning                              |                       |
|                       | learned                               | learned                    |                                       |                       |

## D Qualitative Review of Design Influences, Evaluated Attributes and Evaluation Methods

The summary of design goals in **Table 2** is based off **Table 7**. Similarly, the summary of evaluated attributes in **Table 3** is based off **Table 8**. We gathered the attributes after reading the articles listed in the table(s).

Table 7: Design influences in intelligent assistant research.

| Paper Title                                                                                                            | Year | Design influence                                                           |
|------------------------------------------------------------------------------------------------------------------------|------|----------------------------------------------------------------------------|
| Intelligent media agents in interactive television systems                                                             | 1995 | personalization                                                            |
| SIMPSON: An intelligent assistant for short-term manufacturing scheduling                                              | 1996 | task congruency, information congruency, maintainability                   |
| MASMA: A personal assistant for meetings management                                                                    | 1997 | control of initiative, personalization                                     |
| YPA – an intelligent directory enquiry assistant                                                                       | 1998 | usefulness, user-friendliness                                              |
| MailCat: An Intelligent Assistant for Organizing e-Mail                                                                | 1999 | simplicity, unobtrusiveness                                                |
| INSYDER – an Information Assistant for Business Intelligence                                                           | 2000 | agent attributes                                                           |
| Context-aware Office Assistant                                                                                         | 2000 | context aware computing                                                    |
| USCSH: An active intelligent assistance system                                                                         | 2000 | effectiveness, task accomplishment                                         |
| The Intelligent Classroom: Providing Competent Assistance                                                              | 2001 | competent assistant (bound to specific tasks)                              |
| Mixed-initiative, multi-source information assistants                                                                  | 2001 | mixed initiative agents                                                    |
| A Writer’s Collaborative Assistant                                                                                     | 2002 | Shared Plans theory of collaboration                                       |
| IntelliShopper: a proactive, personal, private shopping assistant                                                      | 2002 | autonomy, personalization, privacy                                         |
| DORIS – Pedagogical Agent in Intelligent Tutoring Systems                                                              | 2002 | environment perception, autonomy, sociability, adaptability, mobility      |
| Balancing Efficiency and Interpretability in an Interactive Statistical Assistant                                      | 2003 | efficiency, interpretability, granularity, context, explicitness           |
| An intelligent personal assistant for task and time management                                                         | 2007 | directable, personalizable, teachable, transparent                         |
| FleXConf: A Flexible Conference Assistant Using Context-Aware Notification Services                                    | 2009 | context awareness                                                          |
| Agent-assisted Task Management That Reduces Email Overload                                                             | 2010 | usability, performance, predictability, understandability                  |
| Ma\$\$iv? An Intelligent Mobile Grocery Assistant                                                                      | 2012 | user centred design                                                        |
| Learning Intelligent System for Student Assistance – LISSA                                                             | 2016 | BDI Agents                                                                 |
| Artemisa: A Personal Driving Assistant for Fuel Saving                                                                 | 2016 | gamification                                                               |
| PrIA: A Private Intelligent Assistant                                                                                  | 2017 | personalize privately instead of aggregating collective data               |
| A Personal Medical Digital Assistant Agent for Supporting Human Operators in Emergency Scenarios                       | 2017 | context awareness, provide assistance without distraction or interruptions |
| Designing Out Stereotypes in Artificial Intelligence: Involving Users in the Personality Design of a Digital Assistant | 2018 | user centred design, participatory design                                  |
| Protecting privacy and open competition with Almond: An open-source virtual assistant                                  | 2019 | openness, privacy, control                                                 |

Table 8: Evaluation of intelligent assistants

| Title                                                                                                                      | Year | Evaluated Attribute                                                                                                                                                     | Group                                      | Type          |
|----------------------------------------------------------------------------------------------------------------------------|------|-------------------------------------------------------------------------------------------------------------------------------------------------------------------------|--------------------------------------------|---------------|
| User interface design assistance for large-scale software development                                                      | 1994 | usability                                                                                                                                                               | usability                                  | qualitative   |
| The Daimler-Benz steering assistant: a spin-off from autonomous driving                                                    | 1994 | driving attributes                                                                                                                                                      | user performance                           | quantitative  |
| An intelligent symbol usage assistant for CAD systems                                                                      | 1994 | predictive accuracy                                                                                                                                                     | system performance                         | quantitative  |
| Intelligent assistance for intravascular telesurgery and experiments on virtual simulator                                  | 1995 | collision times                                                                                                                                                         | user performance                           | quantitative  |
| Agents in Their Midst: Evaluating User Adaptation to Agent-assisted Interfaces                                             | 1998 | usage metrics (sorting time, placement rate), error metrics (user error, agent error, increase in error rate), observations and interviews                              | user and system performance, user feedback | mixed methods |
| An Experiment with Navigation and Intelligent Assistance                                                                   | 1998 | precision (proportion of retrieved information that is relevant), recall (proportion of relevant information that is retrieved), user actions (selections and duration) | user and system performance                | quantitative  |
| C-MAP: Building a Context-Aware Mobile Assistant for Exhibition Tours                                                      | 1998 | usability and user feedback                                                                                                                                             | usability, user feedback                   | mixed methods |
| Intelligold-an expert system for gold plant process design                                                                 | 1999 | case study                                                                                                                                                              | system performance                         | qualitative   |
| MailCat: An Intelligent Assistant for Organizing e-Mail                                                                    | 1999 | predictive accuracy                                                                                                                                                     | system performance                         | quantitative  |
| PTA – A Personal Translation Assistant for Accessing the World Wide Web                                                    | 1999 | user feedback about assistants behavior                                                                                                                                 | user feedback                              | qualitative   |
| INSYDER – an Information Assistant for Business Intelligence                                                               | 2000 | effectiveness (task completion), efficiency (task completion time), satisfaction (subjective acceptance)                                                                | user performance, user feedback            | quantitative  |
| Communication Management: E-Mail and Telephone Assistants                                                                  | 2000 | technical functionality                                                                                                                                                 | system performance                         | quantitative  |
| Balancing Efficiency and Interpretability in an Interactive Statistical Assistant                                          | 2002 | Usability (ease of learnability, usefulness)                                                                                                                            | usability                                  | mixed methods |
| IntelliShopper: a proactive, personal, private shopping assistant                                                          | 2002 | learning accuracy                                                                                                                                                       | system performance                         | quantitative  |
| An intelligent teaching assistant system for logic                                                                         | 2002 | student progress                                                                                                                                                        | user performance                           | quantitative  |
| Balancing Efficiency and Interpretability in an Interactive Statistical Assistant                                          | 2003 | user operations (navigation, analysis, organization)                                                                                                                    | user performance                           | quantitative  |
| Intelligent Assistance, Retrieval, Reminder and Advice for Fuzzy Multicriteria Decision-Making                             | 2003 | prediction                                                                                                                                                              | system performance                         | quantitative  |
| An Intelligent Assistant for Training of Power Plant Operators                                                             | 2006 | operator performance                                                                                                                                                    | user performance                           | quantitative  |
| ECPIA: An email-centric personal intelligent assistant                                                                     | 2006 | technical performance                                                                                                                                                   | system performance                         | na            |
| MIKI: A Speech Enabled Intelligent Kiosk                                                                                   | 2006 | user reactions                                                                                                                                                          | user feedback                              | qualitative   |
| Survey Measures for Evaluation of Cognitive Assistants                                                                     | 2007 | ease of use, usefulness, collaboration, disorientation, flow                                                                                                            | ease of use                                | quantitative  |
| MARA – A Mobile Augmented Reality-Based Virtual Assistant                                                                  | 2007 | user feedback about assistants behavior                                                                                                                                 | user feedback                              | qualitative   |
| Learning Assistant – Personalizing Learning Paths in e-Learning Environments                                               | 2008 | learning performance                                                                                                                                                    | user performance                           | quantitative  |
| RelAltTab: Assisting Users in Switching Windows                                                                            | 2008 | user effort                                                                                                                                                             | user performance                           | quantitative  |
| Intelligent User Assistance for Cost Effective Usage of Mobile Phone                                                       | 2008 | predictive accuracy                                                                                                                                                     | system performance                         | quantitative  |
| Intelligent assistance in authoring dynamically generated web interfaces                                                   | 2008 | user effort, UI Satisfaction, Perceived Usefulness and Ease of Use                                                                                                      | user performance, user feedback            | quantitative  |
| Virtual assistant: an artificial agent for enhancing content acquisition: how ambient media elicit information from humans | 2008 | subjective evaluation                                                                                                                                                   | user feedback                              | quantitative  |
| IPA – An intelligent personal assistant agent for task performance support                                                 | 2009 | learning accuracy                                                                                                                                                       | system performance                         | quantitative  |

Continued on next page

Table 8: Evaluation of intelligent assistants

| Title                                                                                                                                        | Year | Evaluated Attribute                                                           | Group                             | Type          |
|----------------------------------------------------------------------------------------------------------------------------------------------|------|-------------------------------------------------------------------------------|-----------------------------------|---------------|
| Intelligent assistance for teachers in collaborative e-learning environments                                                                 | 2009 | system performance                                                            | system performance                | quantitative  |
| Agent-assisted Task Management That Reduces Email Overload                                                                                   | 2010 | user performance                                                              | user performance                  | quantitative  |
| LABTA: An Agent-Based Intelligent Teaching Assistant for Experiment Courses                                                                  | 2010 | user satisfaction (ease of use, appearance, abilities)                        | user feedback                     | quantitative  |
| Intelligent Content-Based Privacy Assistant for Facebook                                                                                     | 2011 | predictive accuracy                                                           | system performance                | quantitative  |
| ASISTO: An integrated intelligent assistant system for power plant operation and training                                                    | 2011 | user progress                                                                 | user performance                  | quantitative  |
| PTIME: Personalized Assistance for Calendar-ing                                                                                              | 2011 | usefulness, usability, performance                                            | system performance, user feedback | mixed methods |
| The Director’s Lens: An Intelligent Assistant for Virtual Cinematography                                                                     | 2011 | user effort                                                                   | user performance                  | qualitative   |
| SWIMS (Speech-Based Web Interface for Mathematics Using Statistical Language Models): An Intelligent Editing Assistant for Mathematical Text | 2012 | predictive accuracy                                                           | system performance                | quantitative  |
| Gardener: A file browser assistant to help users maintaining semantic folder hierarchy                                                       | 2012 | LKM-GOMS                                                                      | user performance                  | quantitative  |
| Towards an Intelligent Reviewer’s Assistant: Recommending Topics to Help Users to Write Better Product Reviews                               | 2012 | learning accuracy, usefulness                                                 | system performance, user feedback | mixed methods |
| The Voice User Help, a Smart Vehicle Assistant for the Elderly                                                                               | 2012 | technology acceptance                                                         | technology acceptance             | quantitative  |
| Design and Evaluation of a Haptic Computer-Assistant for Telemanipulation Tasks                                                              | 2013 | operator performance                                                          | user performance                  | quantitative  |
| Performance evaluation of an intelligent multimedia learning assistant platform                                                              | 2014 | student progress                                                              | user performance                  | quantitative  |
| Artificial Intelligence Gaming Assistant for Google Glass                                                                                    | 2014 | technical performance                                                         | system performance                | quantitative  |
| A computer vision-based assistant system for the assembly of narrow cabin products                                                           | 2015 | technical performance                                                         | system performance                | quantitative  |
| CogniWin-A Virtual Assistance System for Older Adults at Work                                                                                | 2015 | helpfulness, improved work efficiency, usefulness, wellness                   | user performance, user feedback   | quantitative  |
| An intelligent assistant for physicians                                                                                                      | 2016 | classification accuracy                                                       | system performance                | quantitative  |
| An intelligent system to assist the diagnosis of epilepsy disorder in children: A case of study                                              | 2016 | classification accuracy                                                       | system performance                | quantitative  |
| Understanding User Satisfaction with Intelligent Assistants                                                                                  | 2016 | user satisfaction, user effort, task completeness, speech recognition quality | user and system performance       | quantitative  |
| Artemisa: A Personal Driving Assistant for Fuel Saving                                                                                       | 2016 | driving parameters                                                            | user performance                  | quantitative  |
| Intelligent driving assistant based on accident risk maps analysis and intelligent driving diagnosis                                         | 2017 | Assistant accuracy, driving performance                                       | user and system performance       | quantitative  |
| “What Can I Help You with?”: Infrequent Users’ Experiences of Intelligent Personal Assistants                                                | 2017 | focus group                                                                   | user feedback                     | qualitative   |
| PrIA: A Private Intelligent Assistant                                                                                                        | 2017 | precision comparison with state-of-the art based on user feedback             | system performance, user feedback | quantitative  |
| brAInstorm: Intelligent Assistance in Group Idea Generation                                                                                  | 2017 | Perceived effectiveness, user satisfaction                                    | user feedback                     | na            |
| A Personal Medical Digital Assistant Agent for Supporting Human Operators in Emergency Scenarios                                             | 2017 | usability, responsiveness                                                     | usability                         | qualitative   |
| Darwin: Convolutional Neural Network based Intelligent Health Assistant                                                                      | 2018 | classification accuracy                                                       | system performance                | quantitative  |
| Dinus Intelligent Assistance (DINA) Chatbot for University Admission Services                                                                | 2018 | classification accuracy                                                       | system performance                | quantitative  |
| Iris: A Conversational Agent for Complex Tasks                                                                                               | 2018 | user effort                                                                   | user performance                  | quantitative  |
| PRoA: An intelligent multi-criteria Personalized Route Assistant                                                                             | 2018 | comparison with state of the art                                              | system performance                | quantitative  |
| Context-Aware Conversational Developer Assistants                                                                                            | 2018 | subjective evaluation                                                         | user feedback                     | qualitative   |

Continued on next page

Table 8: Evaluation of intelligent assistants

| <b>Title</b>                                                                 | <b>Year</b> | <b>Evaluated Attribute</b> | <b>Group</b>                | <b>Type</b>  |
|------------------------------------------------------------------------------|-------------|----------------------------|-----------------------------|--------------|
| Usage-Based Learning in Human Interaction with an Adaptive Virtual Assistant | 2019        | user effort                | user performance            | quantitative |
| From Eliza to Xiaolce: challenges and opportunities with social chatbots     | 2018        | conversations per turn     | user and system performance | quantitative |
